# Supplementary material
Source: MDPI journal article supplement (https://www.mdpi.com/2076-3263/12/5/210)
Supplement: s1 [file s1 › geosciences-1663746-supplementary.pdf]

# Supplementary Data

**Table S1.** The total number of crystals counted in 10 fields of view (= 15.6 mm<sup>2</sup>) for all EPS concentrations (1–64 µg.mL<sup>-1</sup>), in both HMW and LMW EPS fractions from non-buffered and buffered growth conditions. The numbers show the patterns of the total number of minerals (1–50 µm and 50–500 µm crystal size classes) precipitated with increasing EPS concentrations.

| Total Number of Crystals  |                    |                                           |      |      |      |      |      |      |       |                        |
|---------------------------|--------------------|-------------------------------------------|------|------|------|------|------|------|-------|------------------------|
| HMW EPS Fraction          |                    |                                           |      |      |      |      |      |      |       |                        |
| Crystal Size Classes (µm) | Culture Conditions | EPS Concentrations (µg.mL <sup>-1</sup> ) |      |      |      |      |      |      |       | All EPS Concentrations |
|                           |                    | 0                                         | 1    | 2    | 4    | 8    | 16   | 32   | 64    |                        |
| 1–50                      | Non-buffered       | 4542                                      | 6586 | 8557 | 7996 | 8906 | 8450 | 9334 | 10005 | 59834                  |
| 50–500                    | Non-buffered       | 21                                        | 57   | 96   | 114  | 142  | 64   | 55   | 12    | 540                    |
| 1–50                      | Buffered           | 5394                                      | 3978 | 7871 | 8502 | 6921 | 5527 | 4252 | 3697  | 40748                  |
| 50–500                    | Buffered           | 41                                        | 18   | 41   | 72   | 95   | 175  | 82   | 150   | 633                    |
| LMW EPS Fraction          |                    |                                           |      |      |      |      |      |      |       |                        |
| Crystal Size Classes (µm) | Culture Conditions | EPS Concentrations (µg.mL <sup>-1</sup> ) |      |      |      |      |      |      |       | All EPS Concentrations |
|                           |                    | 0                                         | 1    | 2    | 4    | 8    | 16   | 32   | 64    |                        |
| 1–50                      | Non-buffered       | 6986                                      | 6860 | 5686 | 6766 | 5836 | 5100 | 5599 | 6506  | 42353                  |
| 50–500                    | Non-buffered       | 114                                       | 209  | 199  | 254  | 269  | 231  | 206  | 223   | 1591                   |
| 1–50                      | Buffered           | 4088                                      | 5046 | 6146 | 6110 | 5952 | 5123 | 7720 | 8702  | 44799                  |
| 50–500                    | Buffered           | 24                                        | 234  | 328  | 335  | 266  | 300  | 306  | 306   | 2075                   |

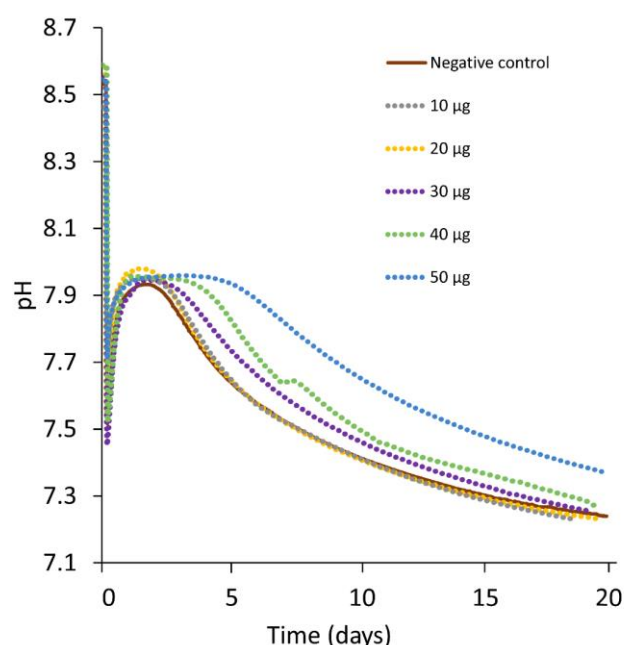

**Figure S1.** Replication of *in vitro* inhibition of calcium carbonate precipitation experiment of HMW EPS from non-buffered medium. A negative control (without EPS) and EPS extracts of concentrations of 10, 20, 30, 40, and 50 µg.mL<sup>-1</sup> were used in the CaCO<sub>3</sub> inhibition assay. The decrease of pH indicates precipitation and a plateau inhibition of carbonate precipitation. A larger plateau (> 30 µg) indicates stronger inhibition of CaCO<sub>3</sub> precipitation (*e.g.*, see arrow in panel A).

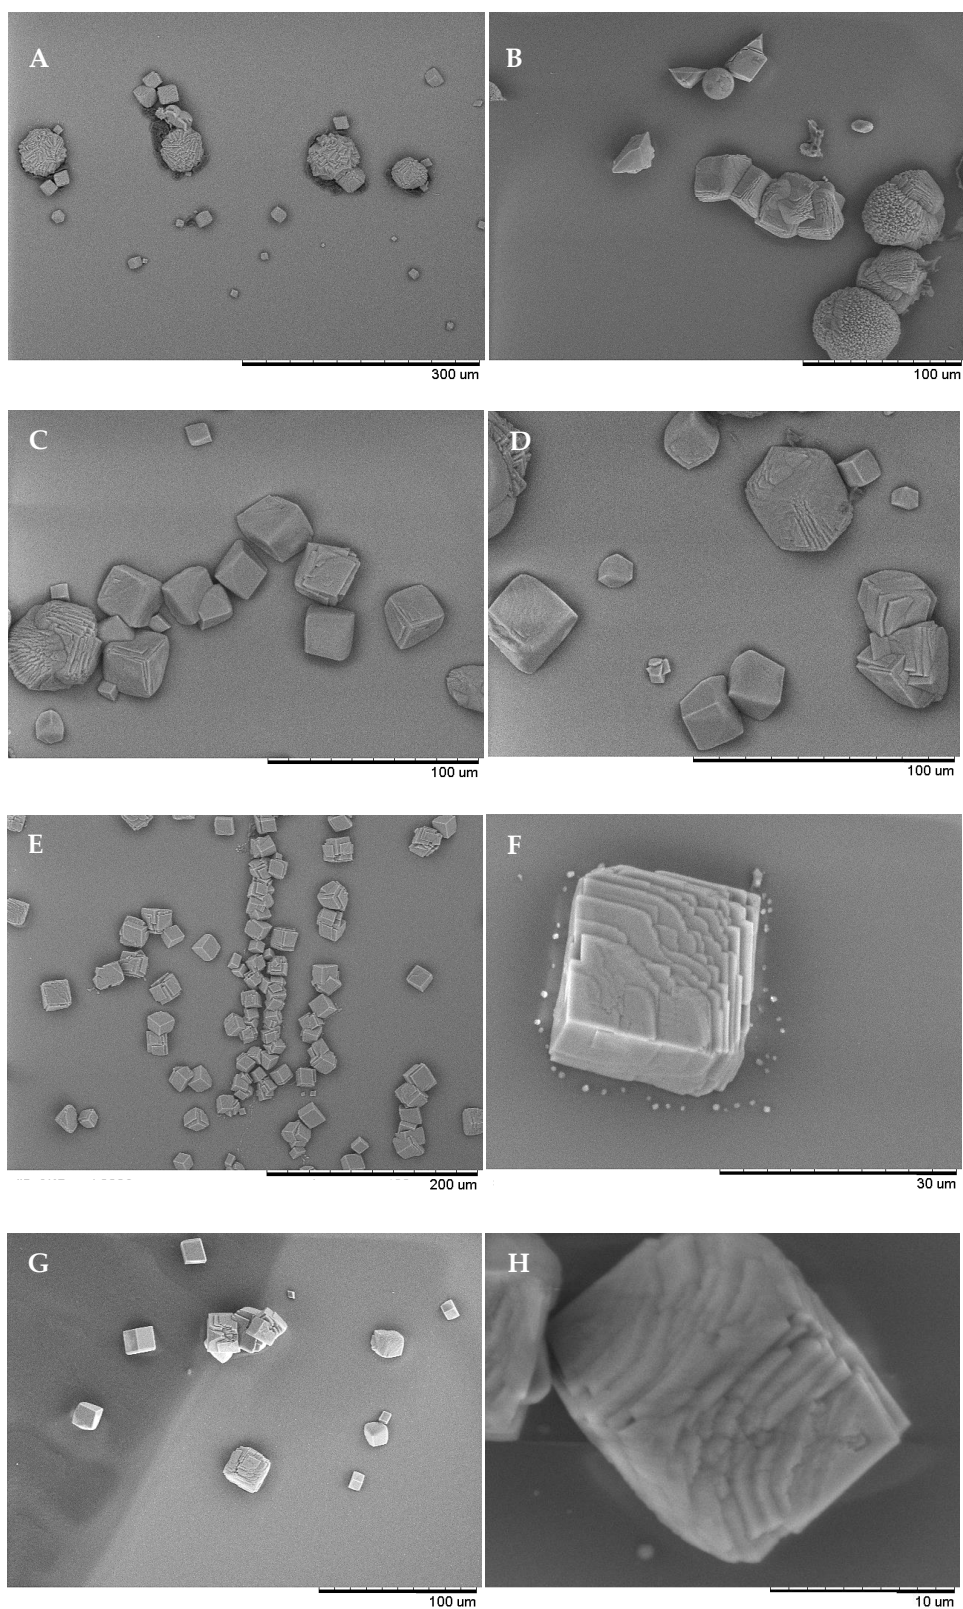

**Figure S2.** SEM images of  $\text{CaCO}_3$  crystals formed in the controls of forced precipitation experiment (solutions without EPS) in HMW from (A-B): non-buffered medium, (C-D): buffered medium and LMW from (E,F): non-buffered medium, and (G-H): buffered medium.

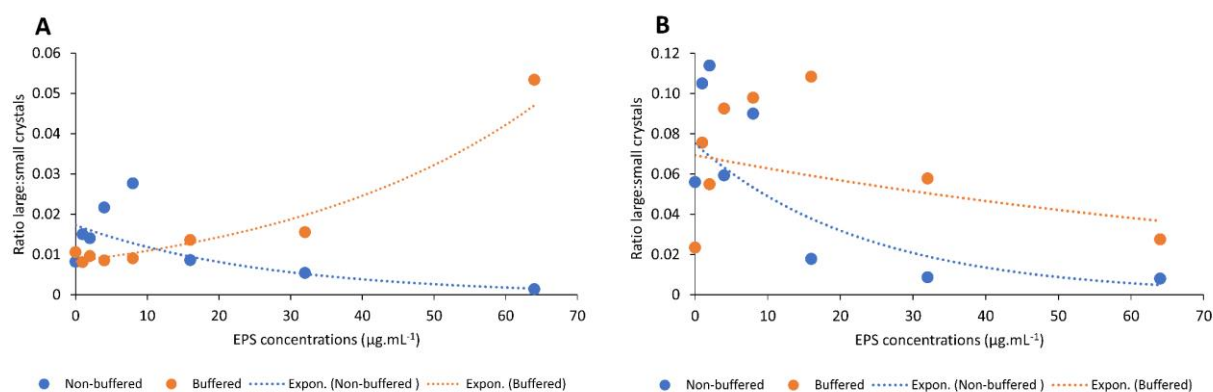

**Figure S3.** Replication of ratios between large and small crystals that precipitated in solutions of (A) the HMW EPS fraction from non-buffered medium (blue symbols and trend line) and from buffered medium (orange symbols and trend line); (B) the LMW EPS fraction from non-buffered medium (blue symbols and trend line) and from buffered medium (orange symbols and trend line). The orange and blue symbols shown at each EPS concentration (0-64  $\mu\text{g.mL}^{-1}$ ) indicate individual ratios for single precipitation experiments.
